# Supplementary material for: Using Mobile Phones to Examine and Enhance Perceptions of Control in Mildly Depressed and Nondepressed Volunteers: Intervention Study
Source: PubMed Central journal article supplement (PMC6251979; doi:10.2196/10114), 2018-11-09
Supplement: mhealth_v6i11e10114_app2.pdf [file mhealth_v6i11e10114_app2.pdf]

Multimedia Appendix 2. ANOVA

Table 1. ANOVA table for analysis of ratings of action control

| Within subjects effects    | <i>F</i>     | <i>p</i>     | $\eta_p^2$   |
|----------------------------|--------------|--------------|--------------|
| Block                      | .441         | .779         | .005         |
| Block * DP-exp             | .523         | .719         | .006         |
| Block *OD                  | .273         | .895         | .003         |
| Block * BDI                | .453         | .770         | .005         |
| Block * Context            | .395         | .812         | .004         |
| Block * OD * BDI           | .566         | .687         | .006         |
| Block * OD * Context       | 1.746        | .139         | .019         |
| Bblock * BDI * Context     | .273         | .895         | .003         |
| Block * OD * BDI * Context | .813         | .517         | .009         |
| Between subjects effects   |              |              |              |
| DP-exp                     | 0.732        | 0.394        | 0.008        |
| OD                         | 0.413        | 0.522        | 0.005        |
| <b>BDI</b>                 | <b>4.053</b> | <b>0.047</b> | <b>0.043</b> |
| Context                    | 1            | 0.32         | 0.011        |
| OD * BDI                   | 0.625        | 0.431        | 0.007        |
| <b>OD * Context</b>        | <b>7.046</b> | <b>0.009</b> | <b>0.072</b> |
| BDI * Context              | 0.314        | 0.577        | 0.003        |
| OD * BDI * Context         | 0.257        | 0.613        | 0.003        |

NB:  $df_{\text{within}} = 4, 364$ ;  $df_{\text{between}} = 1, 91$ ;  $MSE_{\text{within}} = 1651.30$ ;  $MSE_{\text{between}} = 6671.40$
